# Supplementary material for: Embedded atom model for the liquid U–10Zr alloy based on density functional theory calculations
Source: Royal Society of Chemistry journal article supplement (doi:10.1039/c5ra07863f), 2015-01-01
Supplement: c5ra07863f1.pdf [file c5ra07863f1.pdf]

## Electronic Supplementary Information:

### Embedded Atom Model for the Liquid U-10Zr Alloy Based on Density Functional Theory Calculations

*Ning Wang<sup>a</sup>, Tao Jiang<sup>a</sup>, Yanqiu Yang<sup>a</sup>, Jie Tian<sup>a</sup>, Sheng Hu<sup>a</sup>, Shuming Peng<sup>a,\*</sup>, Liuming Yan<sup>b</sup>*

<sup>a</sup> *Institute of Nuclear Physics and Chemistry, China Academy of Engineering Physics, Mianyang 621999, P.R. China*

<sup>b</sup> *Department of Chemistry, Shanghai University, 99 Shangda Road, Shanghai 200444, P.R. China*

**Table S1.** Pairwise functions of the EAM potential (eV)

| $r$ (Å) | $\varphi_{\text{U-U}}$ | $\varphi_{\text{Zr-Zr}}$ | $\varphi_{\text{U-Zr}}$ |
|---------|------------------------|--------------------------|-------------------------|
| 2.0     | 7.8815                 | 7.6699                   |                         |
| 2.2     | 3.4695                 | 3.8775                   | 2.2561                  |
| 2.4     | 1.7588                 | 2.0496                   | 1.4813                  |
| 2.6     | 0.9713                 | 1.0782                   | 0.8165                  |
| 2.8     | 0.4896                 | 0.5026                   | 0.3542                  |
| 3.0     | 0.1682                 | 0.1666                   | 0.0836                  |
| 3.2     | -0.0255                | 0.0005                   | -0.0304                 |
| 3.4     | -0.1191                | -0.0575                  | -0.0512                 |
| 3.6     | -0.1409                | -0.0762                  | -0.0509                 |
| 3.8     | -0.1419                | -0.0843                  | -0.0620                 |
| 4.0     | -0.1374                | -0.0779                  | -0.0546                 |

\* Corresponding author. Tel.: 86-816-2484289; E-mail address: pengshuming@caep.cn (Shuming Peng).

|     |         |         |         |
|-----|---------|---------|---------|
| 4.2 | -0.1241 | -0.0674 | -0.0509 |
| 4.4 | -0.1019 | -0.0512 | -0.0433 |
| 4.6 | -0.0737 | -0.0385 | -0.0367 |
| 4.8 | -0.0538 | -0.0258 | -0.0249 |
| 5.0 | -0.0373 | -0.0173 | -0.0183 |
| 5.2 | -0.0232 | -0.0120 | -0.0155 |
| 5.4 | -0.0140 | -0.0047 | -0.0060 |
| 5.6 | -0.0082 | -0.0008 | 0.0012  |
| 5.8 | -0.0036 | -0.0023 | 0.0041  |
| 6.0 | -0.0023 | -0.0034 | 0.0057  |
| 6.2 | -0.0029 | -0.0036 | 0.0087  |
| 6.4 | -0.0074 | -0.0033 | 0.0101  |
| 6.6 | -0.0050 | -0.0033 | 0.0117  |
| 6.8 | -0.0026 | -0.0043 | 0.0056  |
| 7.0 | -0.0008 | -0.0055 | -0.0004 |

**Table S2.** Transfer functions of the EAM potential (arbitrary unit)

| $r$ (Å) | $\rho_U$ | $\rho_{Zr}$ |
|---------|----------|-------------|
| 2.0     | 0.234747 | 0.131352    |
| 2.2     | 0.171140 | 0.084785    |
| 2.4     | 0.129651 | 0.060474    |
| 2.6     | 0.089397 | 0.033720    |
| 2.8     | 0.055878 | 0.021515    |
| 3.0     | 0.034564 | 0.017485    |
| 3.2     | 0.023558 | 0.017978    |

|     |          |           |
|-----|----------|-----------|
| 3.4 | 0.017806 | 0.020413  |
| 3.6 | 0.015481 | 0.016958  |
| 3.8 | 0.012561 | 0.008864  |
| 4.0 | 0.008589 | 0.005446  |
| 4.2 | 0.006140 | 0.004580  |
| 4.4 | 0.006406 | 0.005951  |
| 4.6 | 0.007599 | 0.006854  |
| 4.8 | 0.007618 | 0.007118  |
| 5.0 | 0.007144 | 0.006983  |
| 5.2 | 0.006641 | 0.006507  |
| 5.4 | 0.006060 | 0.007245  |
| 5.6 | 0.005293 | 0.007068  |
| 5.8 | 0.004717 | 0.005086  |
| 6.0 | 0.003673 | 0.003738  |
| 6.2 | 0.002664 | 0.002704  |
| 6.4 | 0.001258 | 0.002557  |
| 6.6 | 0.000848 | 0.002034  |
| 6.8 | 0.000791 | 0.001081  |
| 7.0 | 0.000891 | -0.000151 |

**Table S3.** Embedding functions of the EAM potential (eV)

| $n$ (a.u.) | $F_U$    | $F_{Zr}$ |
|------------|----------|----------|
| 0.5        | -9.2628  | -5.8363  |
| 0.6        | -10.0276 | -6.2740  |
| 0.7        | -10.5069 | -6.5432  |

|     |          |         |
|-----|----------|---------|
| 0.8 | -10.7700 | -6.6850 |
| 0.9 | -10.8924 | -6.7851 |
| 1.0 | -10.9417 | -6.8342 |
| 1.1 | -10.8819 | -6.8193 |
| 1.2 | -10.7293 | -6.8790 |
| 1.3 | -10.5443 | -6.9088 |
| 1.4 | -10.2920 | -6.9212 |
| 1.5 | -9.9569  | -6.9045 |
| 1.6 | -9.4729  | -6.8656 |
| 1.7 |          | -6.6107 |

**Table S4.** Fitted coefficients for the pairwise Morse potential function

|          | $\varphi_{U-U}$ | $\varphi_{Zr-Zr}$ | $\varphi_{U-Zr}$ |
|----------|-----------------|-------------------|------------------|
| $D_0$    | 0.142           | 0.084             | 0.078            |
| $\alpha$ | 1.081           | 1.295             | 1.072            |
| $r_e$    | 3.828           | 3.791             | 3.956            |

**Table S5.** Fitted coefficients for the Chantasiriwan transfer function

|          | $\rho_U$ | $\rho_{Zr}$ |
|----------|----------|-------------|
| $A$      | 0.732    | 0.411       |
| $B$      | 1.831    | 1.539       |
| $\theta$ | 2.340    | 4.274       |
| $\beta$  | 2.957    | 3.210       |

**Table S6.** Fitted coefficients for the Banerjea embedding function

|          | $F_U$   | $F_{Z_t}$ |
|----------|---------|-----------|
| $F_0$    | -10.898 | -6.174    |
| $\gamma$ | 0.961   | 0.753     |
| $F_1$    | -0.060  | -0.684    |
